# Supplementary material for: Nitrogen-doped carbon composites derived from 7,7,8,8-tetracyanoquinodimethane-based metal–organic frameworks for supercapacitors and lithium-ion batteries
Source: Royal Society of Chemistry journal article supplement (doi:10.1039/c7ra02543b), 2017-01-01
Supplement: c7ra02543b1.pdf [file c7ra02543b1.pdf]

Supporting Information

**Nitrogen doped carbon composites derived from 7,7,8,8-tetracyanoquinodimethane-based metal-organic frameworks for supercapacitors and lithium-ion batteries**

Yongli Tong<sup>a</sup>, Dong Ji<sup>a</sup>, Ping Wang<sup>b</sup>, Hu Zhou<sup>b</sup>, Kazim Akhtar<sup>b</sup>, Xiaoping Shen<sup>d</sup>, Junhao Zhang<sup>\*,a,c</sup>, Aihua Yuan<sup>\*,a,c</sup>

<sup>a</sup>*School of Environmental and Chemical Engineering,* <sup>b</sup>*School of Material*

*Science and Engineering and* <sup>c</sup>*Marine Equipment and Technology Institute,*

*Jiangsu University of Science and Technology, Zhenjiang 212003, P. R. China*

<sup>d</sup>*School of Chemistry and Chemical Engineering, Jiangsu University, Zhenjiang*

*212013, P. R. China*

## Supporting Information Index:

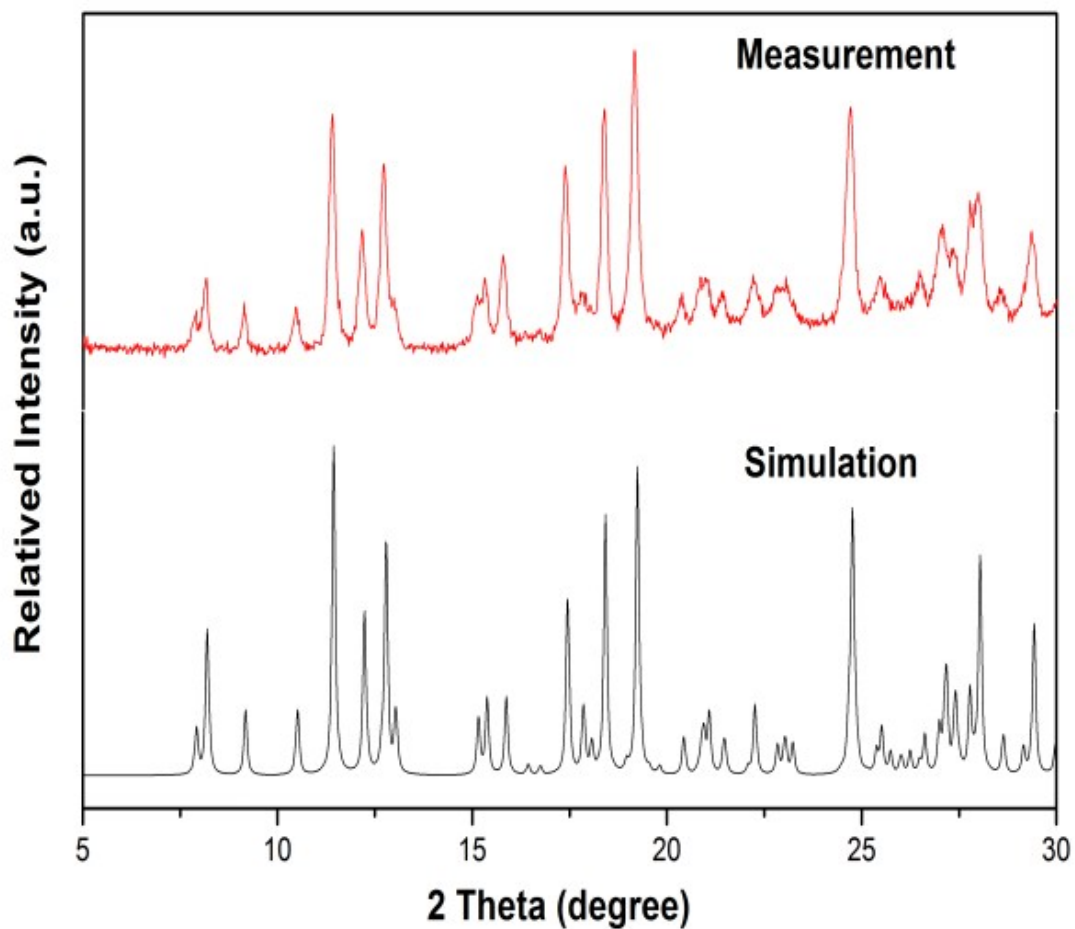

**Fig. S1.** XRD patterns of the as-synthesized Sr-MOF and simulation

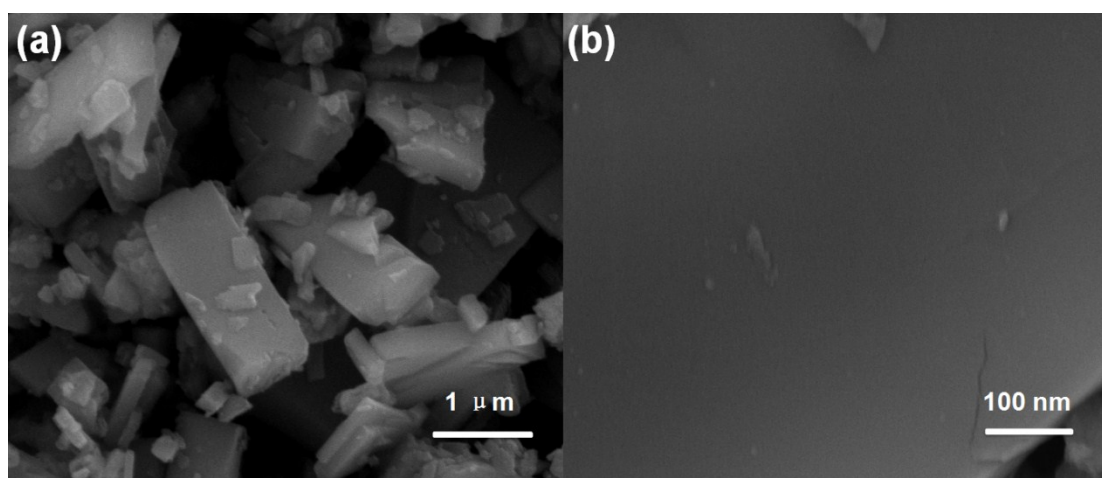

**Fig. S2.** (a-b) FESEM images of the as-synthesized Sr-MOF with different magnifications.

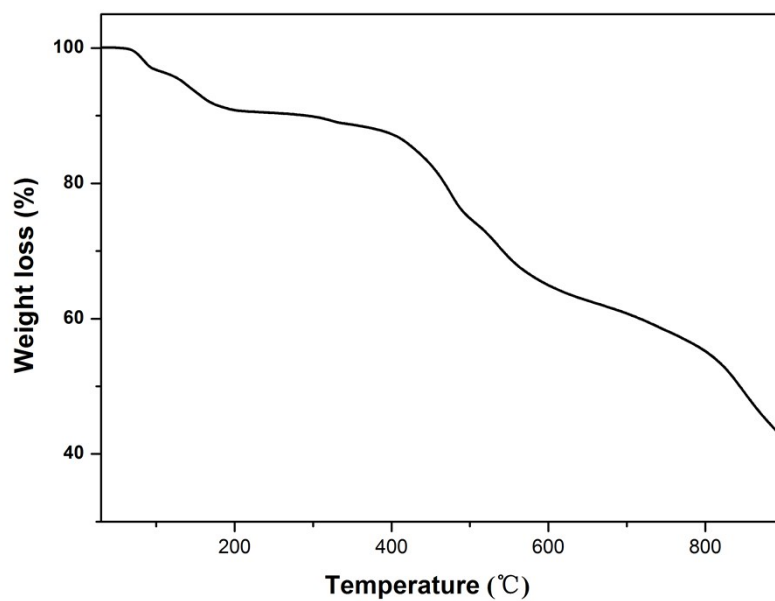

**Fig. S3.** TG curve of the as-synthesized Sr-MOF.

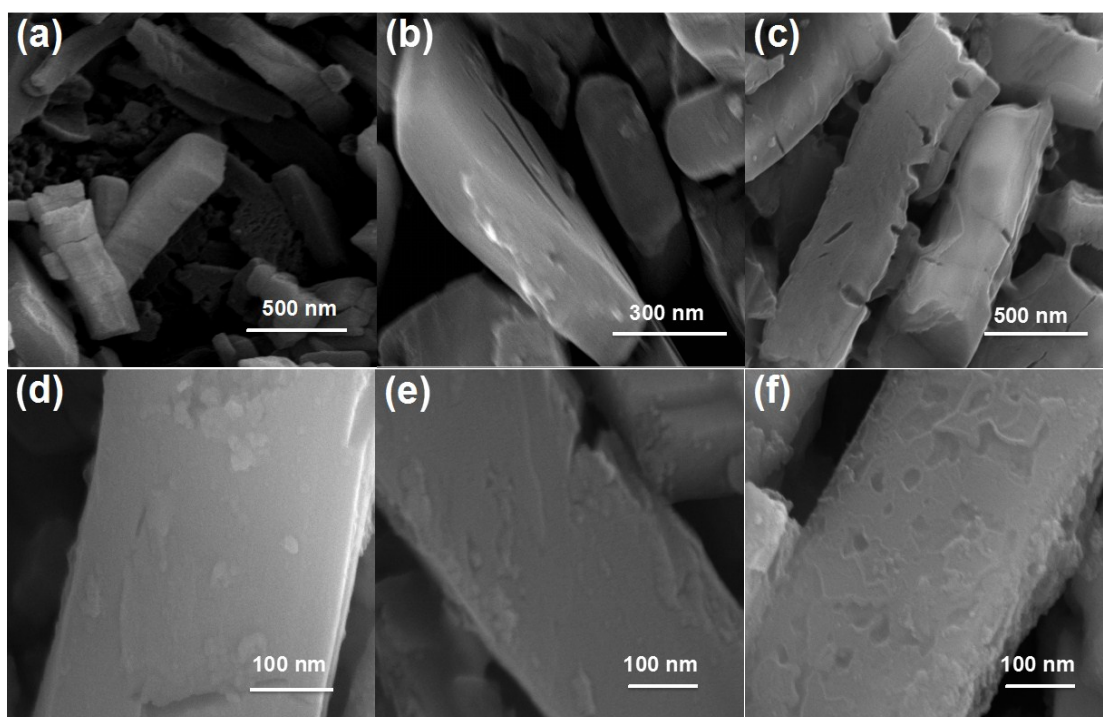

**Fig. S4.** (a,d) FESEM images of N-C-450 with different magnifications; (b,e) FESEM images of N-C-550 with different magnifications; (c,f) FESEM images of N-C-650 with different magnifications.

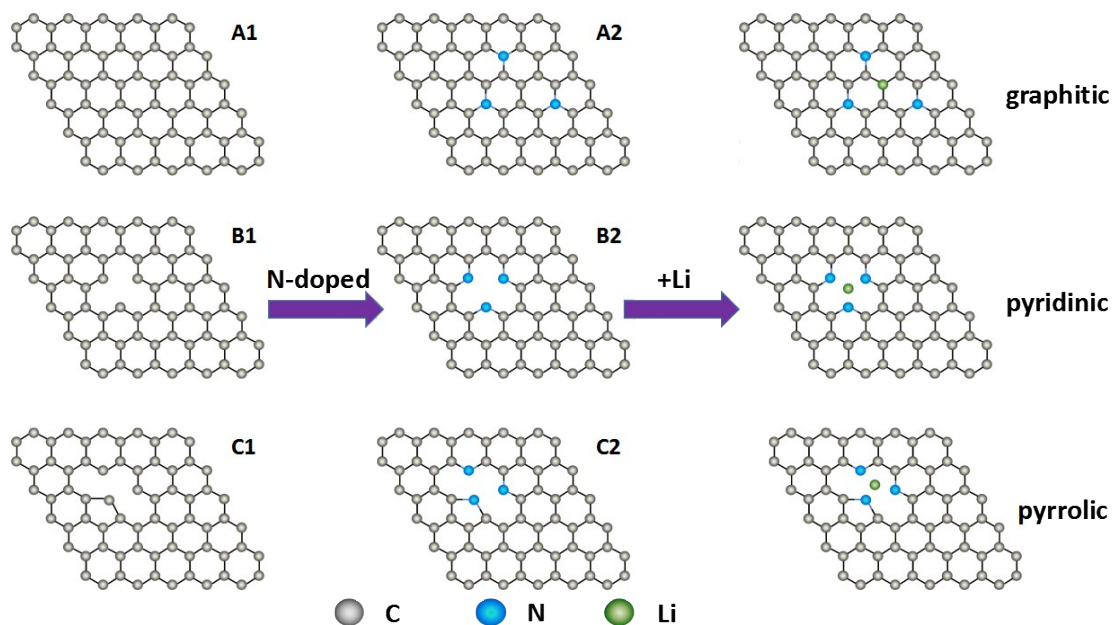

**Fig. S5.** The no N-doping graphene materials (A1, B1, C1) and corresponding N-doped counterparts (A2, B2, C2).

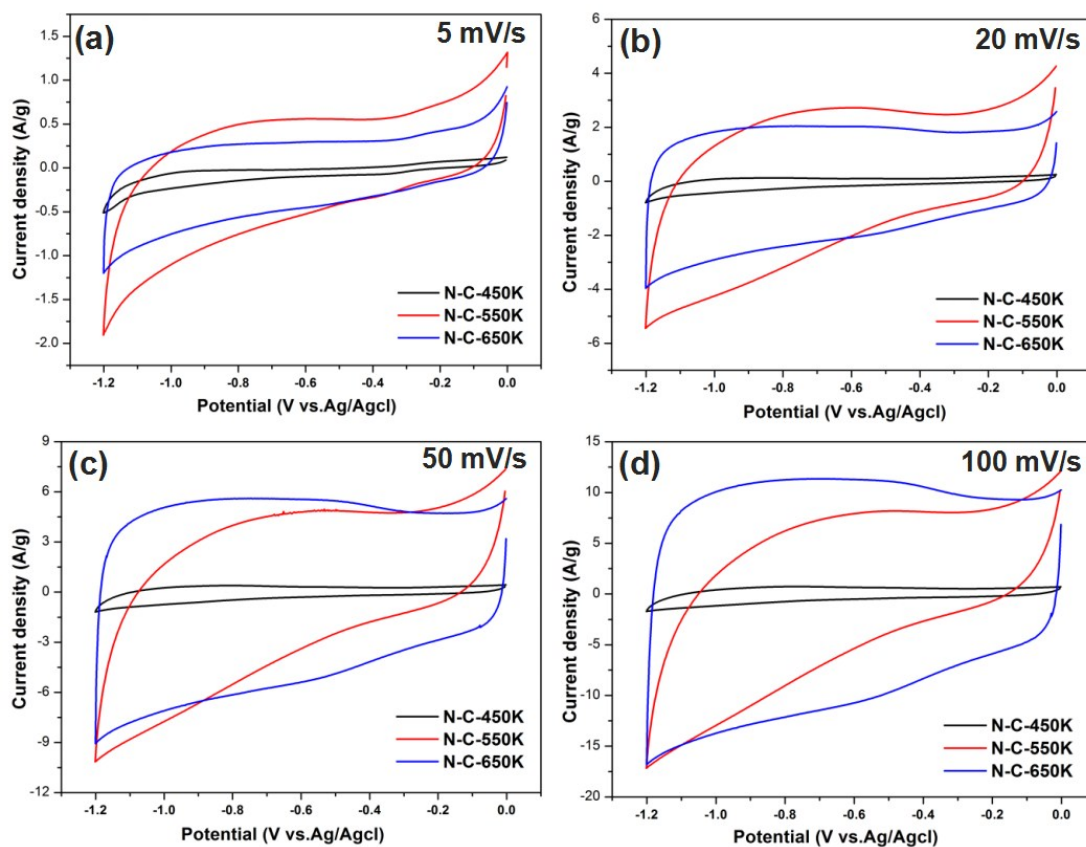

**Fig. S6.** Cyclic voltammeteries of N-C-450, N-C-550 and N-C-650 used as supercapacitor electrodes at different scan rates in the voltage of -1.2 to 0 V: (a)  $5 \text{ mV s}^{-1}$ ; (b)  $20 \text{ mV s}^{-1}$ ; (c)  $50 \text{ mV s}^{-1}$ ; (d)  $100 \text{ mV s}^{-1}$ .

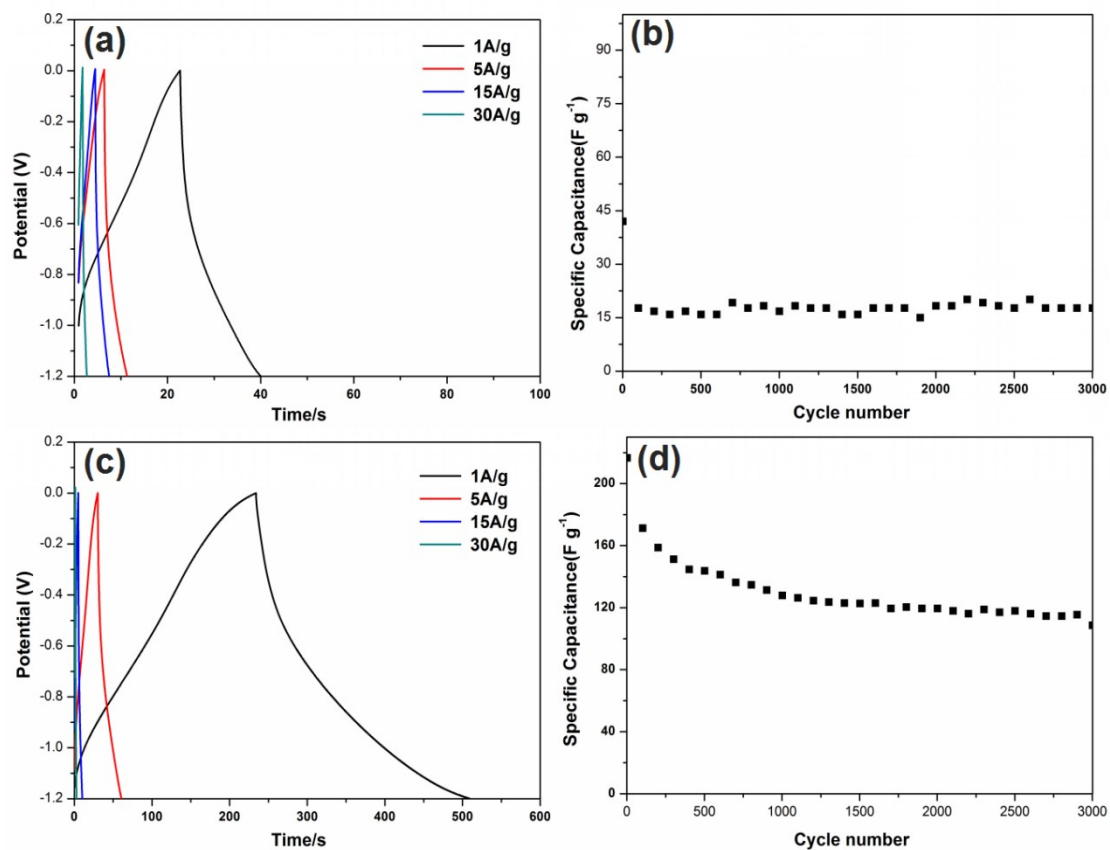

**Fig. S7.** (a) Galvanostatic charge-discharge curves of the N-C-450 used as supercapacitor electrode at various current densities; (b) Cycling stability of the N-C-450 sample at a current density of 1.0 A g<sup>-1</sup>; (c) Galvanostatic charge-discharge curves of the N-C-550 used as supercapacitor electrode at various current densities; (d) Cycling stability of the N-C-550 sample at a current density of 1.0 A g<sup>-1</sup>.

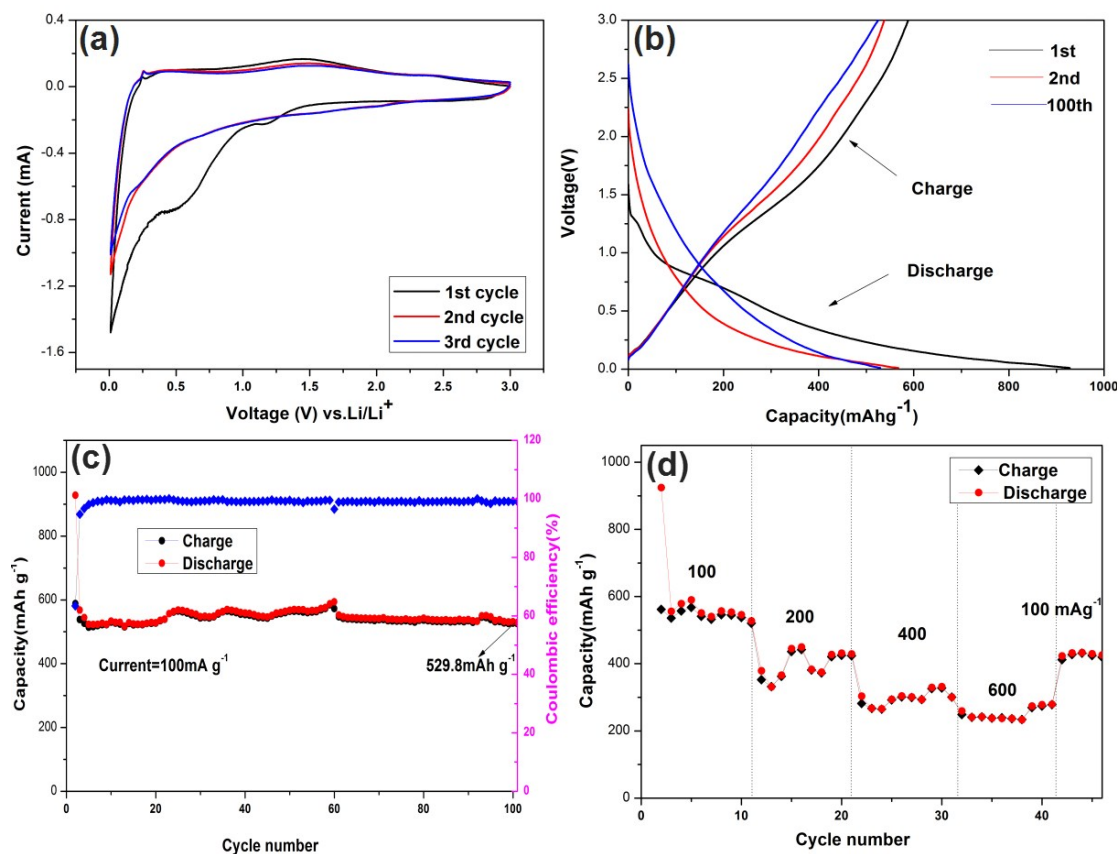

**Fig. S8.** Electrochemical performance of the N-C-450 anode material for LIBs: (a) Cyclic voltammetry curve at  $0.2 \text{ mV s}^{-1}$  scan rate in the voltage of 0.1 to 3.0 V; (b) Galvanostatic charge-discharge profiles at a current density of  $100 \text{ mA g}^{-1}$ ; (c) Cycling performance at a current density of  $100 \text{ mA g}^{-1}$ ; (d) Rate performance at different current densities from 100 to  $600 \text{ mA g}^{-1}$ .



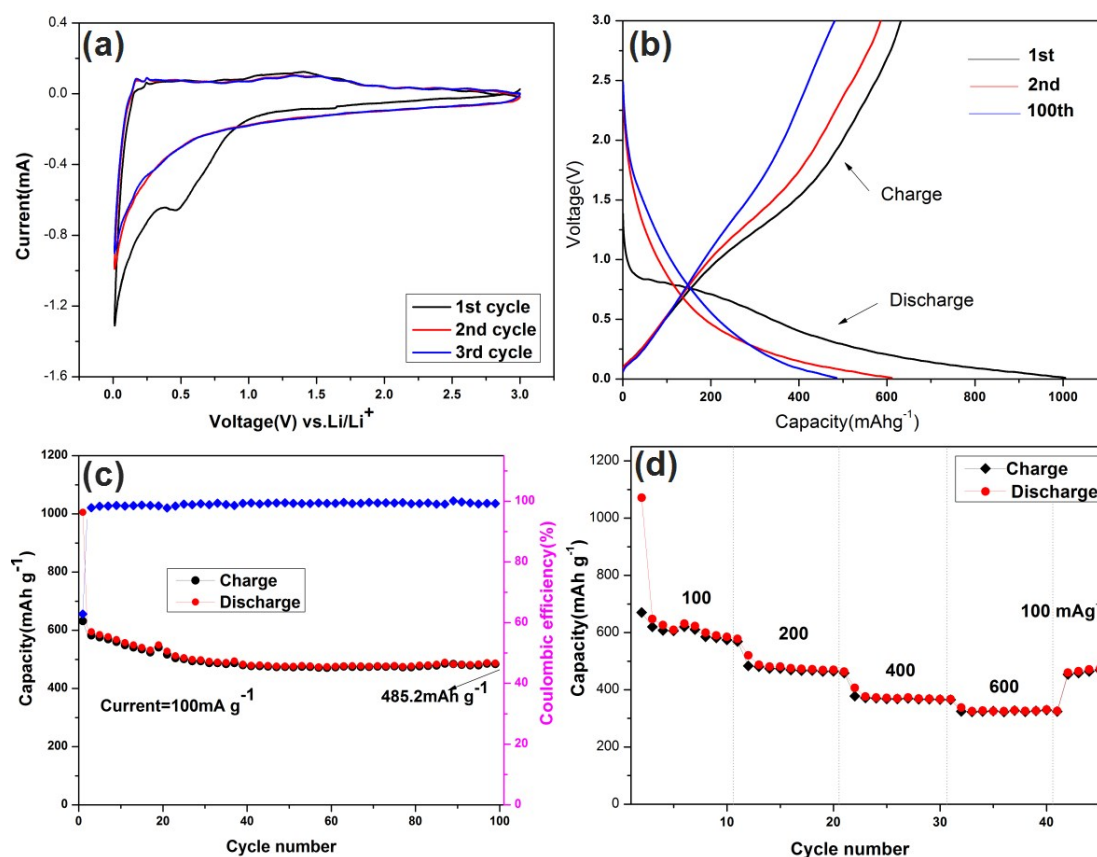

**Fig. S9.** Electrochemical performance of the N-C-650 anode material for LIBs: (a) Cyclic voltammetry curve at  $0.2 \text{ mV s}^{-1}$  scan rate in the voltage of 0.1 to 3.0 V; (b) Galvanostatic charge–discharge profiles at a current density of  $100 \text{ mA g}^{-1}$ ; (c) Cycling performance at a current density of  $100 \text{ mA g}^{-1}$ ; (d) Rate performance at different current densities from 100 to  $600 \text{ mA g}^{-1}$ .

**Tab. S1:** Capacitances of the representative MOF-derived carbons in aqueous electrolytes

| Samples            | Electrolyte                  | Scan rate<br>$\text{mV s}^{-1}$ | Specific capacity<br>( $\text{F g}^{-1}$ ) | Ref.     |
|--------------------|------------------------------|---------------------------------|--------------------------------------------|----------|
| C800               | 1M $\text{H}_2\text{SO}_4$   | 5                               | 202.0                                      | 1        |
| CZIF69a            | 0.5M $\text{H}_2\text{SO}_4$ | 5                               | 168                                        | 2        |
| Z-900              | 0.5M $\text{H}_2\text{SO}_4$ | 5                               | 214                                        | 3        |
| NPC <sub>650</sub> | 1 M $\text{H}_2\text{SO}_4$  | 5                               | 167                                        | 4        |
| N-C-650            | 6 M KOH                      | 5                               | 223.7                                      | Our work |

1. H. L. Jiang, B. Liu, Y. Q. Lan, K. Kuratani, T. Akita, H. Shioyama, F. Q. Zong and Q. Xu, *J. Am. Chem. Soc.*, 2011, **133**, 11854-11857.

2. Q. F. Wang, W. Xia, W. H. Guo, L. An, D. G. Xia and R. Q. Zou, *Chem. Asian J.*, 2013, **8**, 1879-1885.
3. W. Chaikittisilp, M. Hu, H. J. Wang, H. S. Huang, T. Fujita, K. C. W. Wu, L. C. Chen, Y. Yamauchi and K. Ariga, *Chem. Commun.*, 2012, **48**, 7259-7261.
4. B. Liu, H. Shioyama, H. L. Jiang, X. B. Zhang and Q. Xu, *Carbon*, 2010, **48**, 456-463.
